# Supplementary figures and images for: Quantitative depth profile analysis using short single pulse responses in LA-ICP-Q-MS experiments
Source: Royal Society of Chemistry journal article supplement (doi:10.1039/d4ja00082j), 2024-01-01

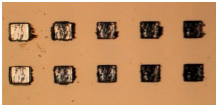

Supplement: d4ja00082j2.pdf [file d4ja00082j2.pdf]

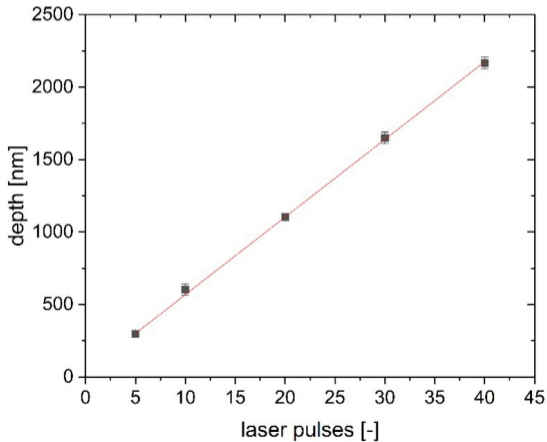

Supplement: d4ja00082j3.pdf [file d4ja00082j3.pdf]
